# Supplementary material for: Validated and Predictive Processing of Gas Chromatography-Mass Spectrometry Based Metabolomics Data for Large Scale Screening Studies, Diagnostics and Metabolite Pattern Verification
Source: Metabolites. 2012 Oct 31;2(4):796–817. doi: 10.3390/metabo2040796 (PMC3901241; doi:10.3390/metabo2040796)
Supplement: Supplementary File 1 — PDF-Document (PDF, 742 KB) [file metabolites-02-00796-s001.pdf]

## **Supporting Text**

### **Pre-experimental procedures**

Prior to the experimental tests, subjects performed a pre-experiment incremental test on an ergometer cycle (Monark 839E) to exhaustion in order to determine  $\text{VO}_{2\text{peak}}$  as a mean of 60 seconds. The MetaMax II (CORTEX Biophysik GmbH, Leipzig, Germany) system, which previously has been validated in our laboratory (Larsson et al. 2004), was used for determination of  $\text{VO}_2$ . The initial workload of 150 W was increased with 40 W every 3 minute until volitional exhaustion and the cadence was maintained at 70 rpm during the whole test. A standardized breakfast was ingested at 7.30 am, one hour prior to every experimental test. The breakfast consisted of drinkable yoghurt in an amount related to bodyweight (0.5g carbohydrate/kg bodyweight). The amount of protein and fat in the yoghurt were 3 and 0.5 percentage by weight of yoghurt respectively. Subjects were instructed to maintain food diaries prior to test 1 and then repeat the same diet prior to the second test. Subjects were also instructed not to perform any exercise or consume alcohol the day before each test and to avoid stress in the morning of the test day.

### **Blood sampling**

The venous blood samples were all collected into vacutainer tubes, one SST™ II Advance tube (BD Diagnostics-Preanalytical Systems, UK), one K3E 15% 0.054ml (BD Vacutainer Systems, UK) and two 9NC 0.129M tubes (BD Vacutainer Systems, UK). Blood was collected before (pre exercise) and immediately after (post exercise) completed ergometer cycling.

### **Sampling, extraction and derivatization of human blood serum samples**

The metabolites were extracted with an extraction solution containing methanol and water (8:1). Eleven stable isotopic reference compounds representing different kinds of metabolites ( $[\text{}^2\text{H}_4]$ -succinic acid,  $[\text{}^{13}\text{C}_5, \text{}^{15}\text{N}]$ -glutamic acid,  $[\text{}^2\text{H}_7]$ -cholesterol,  $[\text{}^{13}\text{C}_3]$ -myristic acid,  $[\text{}^{13}\text{C}_4]$ - $\alpha$ -ketoglutarate,  $[\text{}^{13}\text{C}_{12}]$ -sucrose,  $[\text{}^{13}\text{C}_4]$ -hexadecanoic acid,  $[\text{}^{13}\text{C}_5]$ -Proline,  $[\text{}^2\text{H}_6]$ -salicylic acid,  $[\text{}^2\text{H}_4]$ -putrescine and  $[\text{}^{13}\text{C}_6]$ -glucose, 7 ng/  $\mu\text{L}$ ) were included in the extraction solution as internal standards. Serum (100 $\mu\text{L}$ ) was mixed with extraction solution (900  $\mu\text{L}$ ). This mix was kept on ice for 10 min and extracted using a MM302 vibration mill (Retsch GmbH & Co. KG, Haan, Germany) at 30 Hz for 2 min with a 3-mm tungsten carbide bead (Retsch GmbH & Co. KG). After extraction the samples were kept on ice for 2 h followed by 10 min centrifugation at 4° C (20,800 x g) and supernatants collected. As many serum metabolites are non-volatile, the samples were derivatized before GC/MS analysis. Therefore, 200  $\mu\text{L}$  of the supernatant was transferred to a GC-vial and evaporated to dryness in a vacuum centrifuge. Derivatization was carried out in two

steps. First, 30  $\mu\text{L}$  methoxyamine hydrochloride (15 mg/ mL) in pyridine was added and the vials were shaken vigorously for 12 minutes followed by 1 h incubation at 70 °C and another 16 h at room temperature. Then, 30  $\mu\text{L}$  of *N*-methyl-*N*-(trimethylsilyl)-trifluoroacetamide (MSTFA) with 1% trimethylsilyl (TMS) was added to each vial. The vials were shaken and incubated for 1 hour at room temperature. Just prior to GC-MS analysis 30  $\mu\text{L}$  heptane, containing 15 ng/  $\mu\text{L}$  methylsterate as an injection internal standard was added.

**GC/MS.** 1  $\mu\text{L}$  of the derivatized sample was injected splitless by an Agilent 7683 autosampler (Agilent, Atlanta; GA, USA) into an Agilent 6890 gas chromatograph equipped with a 10 m x 0.18 mm i.d. fused silica capillary column with a chemically bonded 0.18  $\mu\text{m}$  DB 5-MS stationary phase (J&W Scientific, Folsom, CA, USA). The injector temperature was 270°C, the septum purge flow was 20 ml min<sup>-1</sup> and the purge was turned on after 60 s. The gas flow rate through the column was 1 ml min<sup>-1</sup>, the column temperature was held at 70°C for 2 minutes, then increased by 40°C min<sup>-1</sup> to 320°C, and held there for 1 min. The column effluent was introduced into the ion source of a Pegasus III time-of-flight mass spectrometer, GC/TOFMS (Leco Corp., St Joseph, MI, USA). The transfer line and the ion source temperatures were 250°C and 200°C, respectively. Ions were generated by a 70 eV electron beam at an ionization current of 2.0 mA, and 30 spectra s<sup>-1</sup> were recorded in the mass range 60 to 800 m/z. The acceleration voltage was turned on after a solvent delay of 170 s.

**Supporting table S1 – Identified metabolites**

| NAME                         | ID           | MATCH VALUE <sup>a</sup> | RI-RI library |
|------------------------------|--------------|--------------------------|---------------|
| 3-Amino-2-piperidone         | HMDB00323    | 946                      | 0             |
| 3-hydroxybutanoic acid       | HMDB00357    | 861                      | 8             |
| Adenine                      | HMDB00034    | 773                      | -10           |
| Adenosine-5-monophosphate    | HMDB00045    | 781                      | 4             |
| alpha-Tocopherol             | HMDB01893    | 897                      | 2*            |
| Arachidonic acid             | HMDB01043    | 864                      | -3            |
| Arginine                     | HMDB00517    | 924                      | -1            |
| Asparagine                   | HMDB00168    | 940                      | 0             |
| Aspartic acid                | HMDB00191    | 888                      | -7            |
| beta-Alanine                 | HMDB00056    | 788                      | 2             |
| beta-D-Methylglucopyranoside | CAS 709-50-2 | 950                      | 4             |
| beta-Sitosterol              | HMDB00852    | 726                      | 2             |
| Campesterol                  | HMDB02869    | 739                      | -10           |
| Capric acid                  | HMDB00511    | 716                      | 1*            |
| Cholesterol                  | HMDB00067    | 910                      | 8             |
| Citric acid                  | HMDB00094    | 973                      | -3            |
| Creatinine                   | HMDB00562    | 909                      | -2            |
| Cysteine                     | HMDB00574    | 948                      | 1             |
| Cystine                      | HMDB00192    | 917                      | 0             |
| Docosahexaenoic acid         | HMDB02183    | 889                      | 2*            |
| Dodecanoic acid              | HMDB00638    | 843                      | -1            |
| Elaidic acid                 | HMDB00573    | 942                      | 1*            |
| Erythrose                    | HMDB02649    | 643                      | -4            |
| Fructose                     | HMDB00660    | 947                      | -5            |
| Galactono-1,4-lactone        | HMDB02541    | 933                      | 3             |
| Glucose                      | HMDB00122    | 952                      | -6            |
| Glutamic acid                | HMDB00148    | 882                      | 0*            |
| Glutamine                    | HMDB00641    | 960                      | 0             |
| Glyceric acid                | HMDB00139    | 753                      | -2            |
| Glycerol-3-phosphate         | HMDB00126    | 920                      | -4            |
| Glycine                      | HMDB00123    | 945                      | 1*            |
| Heptadecanoic acid           | HMDB02259    | 632                      | -2            |
| Heptanoic acid               | HMDB00666    | 900                      | 4             |
| Histidine                    | HMDB00177    | 865                      | 4             |
| Hydroxyproline               | HMDB00725    | 834                      | -2            |
| Inosine                      | HMDB00195    | 790                      | -18           |
| Isoleucine                   | HMDB00172    | 929                      | 1*            |
| Ketoleucine                  | HMDB00762    | 749                      | 0*            |
| Kynurenine                   | HMDB00684    | 690                      | -1            |
| Linoleic acid                | HMDB00673    | 937                      | -2            |
| Lysine                       | HMDB00182    | 932                      | 3             |
| Malic acid                   | HMDB00156    | 901                      | -3            |
| Methionine                   | HMDB00696    | 861                      | 0             |

|                          |              |     |     |
|--------------------------|--------------|-----|-----|
| Methyl palmitate         | CAS 112-39-0 | 745 | 0   |
| myo-Inositol             | HMDB00211    | 977 | -3  |
| myo-Inositol-1-phosphate | HMDB00213    | 923 | -3  |
| Nonanoic acid            | HMDB00847    | 665 | -3  |
| Oleic acid               | HMDB00207    | 824 | -2  |
| Ornithine                | HMDB00214    | 946 | -3  |
| Palmitic acid            | HMDB00220    | 925 | 12* |
| Palmitoleic acid         | HMDB03229    | 935 | -4  |
| Phenylalanine            | HMDB00159    | 950 | 0   |
| Phosphoric acid          | HMDB02142    | 868 | -4* |
| Proline                  | HMDB00162    | 835 | -4  |
| Putrescine               | HMDB01414    | 787 | -4* |
| Pyroglutamic acid        | HMDB00267    | 939 | 1   |
| Quinic acid              | HMDB03072    | 683 | 0   |
| Stearic acid             | HMDB00827    | 956 | -6  |
| Succinic acid            | HMDB00254    | 865 | 0*  |
| Taurine                  | HMDB00251    | 876 | -4  |
| Threonic acid            | HMDB00943    | 947 | -4  |
| Threonine                | HMDB00167    | 957 | 0*  |
| Tryptophan               | HMDB00929    | 961 | 2   |
| Tyrosine                 | HMDB00158    | 958 | 1   |
| Urea                     | HMDB00294    | 956 | 12  |
| Uric acid                | HMDB00289    | 904 | 1   |
| Uridine                  | HMDB00296    | 824 | -3  |

\* RT-RT library

<sup>a</sup>

Mass spectra match values according to NIST MS-Search 2.0.

Monosaccharides are not included in the list with the exception of Fructose and Glucose

**Supporting table S2 - Summary of descriptive parameters for OPLS-DA models**

| H-MCR RESOLVED,<br>OPLS-DA MODEL<br>SAMPLES | R2X<br>(%) | R2Y<br>(%) | Q2<br>(%) | CV-ANOVA<br>(p-value) | OPLS COMPONENTS<br>(NUM) | RESOLVED<br>METABOLITES<br>(NUM) | SAMPLES<br>(NUM) |
|---------------------------------------------|------------|------------|-----------|-----------------------|--------------------------|----------------------------------|------------------|
| S1                                          | 31,7       | 92,6       | 76,4      | 3,5E-5                | 1+1                      | 206                              | 23               |
| S2                                          | 37,0       | 98,7       | 87,0      | 1,1E-6                | 1+2                      | 223                              | 24               |
| S3                                          | 19,9       | 96,6       | 78,0      | 2,0E-5                | 1+1                      | 218                              | 22               |
| S4                                          | 40,4       | 97,8       | 84,7      | 4,3E-6                | 1+2                      | 233                              | 24               |
| S5                                          | 30,7       | 90,9       | 52,2      | 0,067                 | 1+1                      | 168                              | 16               |
| S1-S4                                       | 25,1       | 83,7       | 75,4      | 5,7E-26               | 1+1                      | 167                              | 93               |

**Abbreviations**

S1 – Subset 1 based on property data

S2 – Subset 2 based on property data

S3 – Subset 3 based on property data

S4 – Subset 4 based on property data

S1-S4 – All pre- and post exercise samples from exercise occasion one and two.

S5 – Subset based on acquired analytical data

S6 – Test set for S5 i.e. remaining pre- and post exercise samples from exercise occasion one and two.

### Supporting figure S1 - Representative subset selection based on property data

PCA score plots for the 24 subjects based on 34 property data variables used for diversity-based subset selection. The figure show each of the four subgroups (S1, S2, S3 and S4), and their location in the score space.

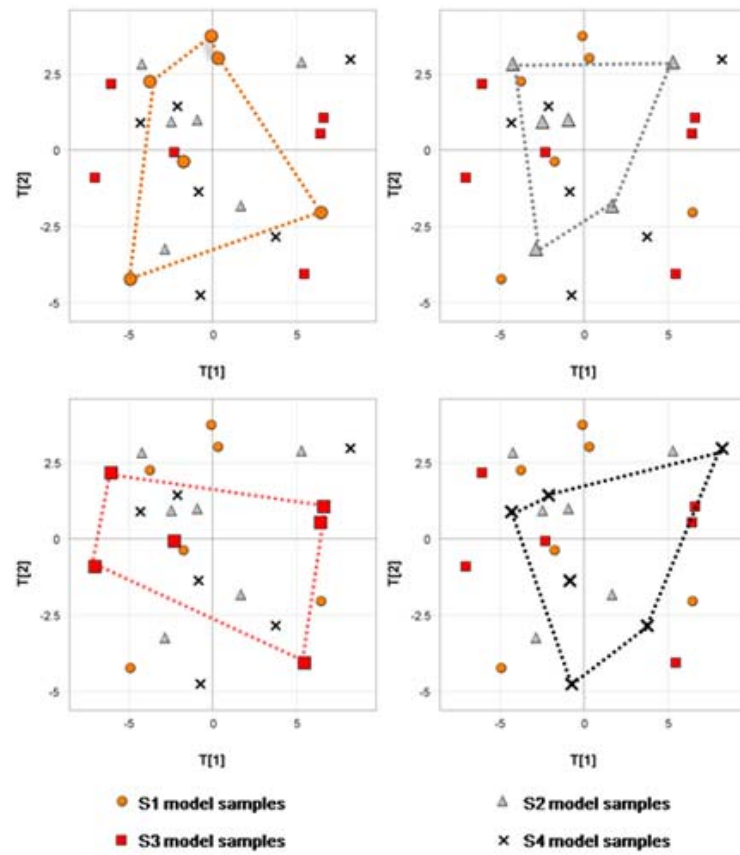

**Supporting table S3 - Summary of sample prediction results**

| H-MCR RESOLVED,<br>OPLS-DA MODEL SAMPLES | H-MCR PREDICTED,<br>OPLS-DA TEST SAMPLES | CLASS PREDICTION<br>(CV)<br>(%) | CLASS PREDICTION<br>(TEST SET)<br>(%) |
|------------------------------------------|------------------------------------------|---------------------------------|---------------------------------------|
| S1                                       | S2, S3, S4                               | 91,3                            | 94,3                                  |
| S2                                       | S1, S3, S4                               | 100                             | 97,1                                  |
| S3                                       | S1, S2, S4                               | 100                             | 93,0                                  |
| S4                                       | S1, S2, S3                               | 100                             | 97,1                                  |
| S5                                       | S6                                       | 93,8                            | 96,1                                  |
| S1-S4                                    | —                                        | 97,9                            | —                                     |

**Abbreviations**

S1 – Subset 1 based on property data

S2 – Subset 2 based on property data

S3 – Subset 3 based on property data

S4 – Subset 4 based on property data

S1-S4 – All pre- and post exercise samples from exercise occasion one and two.

S5 – Subset based on acquired analytical data

S6 – Test set for S5 i.e. remaining pre- and post exercise samples from exercise occasion one and two.

**Table S4 Summary of longitudinal sample prediction results**

| H-MCR RESOLVED*,<br>OPLS-DA MODEL SAMPLES | H-MCR PREDICTED,<br>OPLS-DA TEST SAMPLES<br>(n=64) | CLASS PREDICTION (CV)<br>(%) | CLASS PREDICTION<br>(TEST SET)<br>(%) |
|-------------------------------------------|----------------------------------------------------|------------------------------|---------------------------------------|
| <b>S1+</b> S2, S3, S4                     | S7                                                 | 97,8                         | 92,2                                  |
| <b>S2+</b> S1, S3, S4                     | S7                                                 | 95,7                         | 92,2                                  |
| <b>S3+</b> S1, S2, S4                     | S7                                                 | 91,4                         | 93,8                                  |
| <b>S4+</b> S1, S2, S3                     | S7                                                 | 97,8                         | 96,9                                  |
| <b>S5+S6</b>                              | S7                                                 | 93,5                         | 92,2                                  |
| <b>S1-S4</b>                              | S7                                                 | 97,8                         | 92,2                                  |

\*Bold text – H-MCR resolved samples

**Abbreviations**

S1 – Subset 1 based on property data

S2 – Subset 2 based on property data

S3 – Subset 3 based on property data

S4 – Subset 4 based on property data

S1-S4 – All pre- and post exercise samples from exercise occasion one and two.

S5 – Subset based on acquired analytical data

S6 – Test set for S5 i.e. remaining pre- and post exercise samples from exercise occasion one and two.

S7 - Samples from test occasion three and four analytically characterised 8 month after S1-S6

### Supporting table S5 - metadata

|           | Rainfall Data (mm)   |            |            |            |            |            |            |            |            |             |             |             |             |             |             |             |             |             |             |             |             |             |             |             |             |             |             |             |             |             |     |  |
|-----------|----------------------|------------|------------|------------|------------|------------|------------|------------|------------|-------------|-------------|-------------|-------------|-------------|-------------|-------------|-------------|-------------|-------------|-------------|-------------|-------------|-------------|-------------|-------------|-------------|-------------|-------------|-------------|-------------|-----|--|
|           | Rainfall-1           | Rainfall-2 | Rainfall-3 | Rainfall-4 | Rainfall-5 | Rainfall-6 | Rainfall-7 | Rainfall-8 | Rainfall-9 | Rainfall-10 | Rainfall-11 | Rainfall-12 | Rainfall-13 | Rainfall-14 | Rainfall-15 | Rainfall-16 | Rainfall-17 | Rainfall-18 | Rainfall-19 | Rainfall-20 | Rainfall-21 | Rainfall-22 | Rainfall-23 | Rainfall-24 | Rainfall-25 | Rainfall-26 | Rainfall-27 | Rainfall-28 | Rainfall-29 | Rainfall-30 |     |  |
| Sub-group | 22                   | 23         | 24         | 25         | 26         | 27         | 28         | 29         | 30         | 31          | 32          | 33          | 34          | 35          | 36          | 37          | 38          | 39          | 40          | 41          | 42          | 43          | 44          | 45          | 46          | 47          | 48          | 49          | 50          | 51          | 52  |  |
| Group 1   | Sub (30 min test 1)  | 144        | 152        | 161        | 170        | 178        | 187        | 195        | 204        | 212         | 220         | 228         | 236         | 244         | 252         | 260         | 268         | 276         | 284         | 292         | 300         | 308         | 316         | 324         | 332         | 340         | 348         | 356         | 364         | 372         | 380 |  |
|           | Sub (30 min test 2)  | 158        | 165        | 173        | 180        | 188        | 195        | 202        | 210        | 217         | 224         | 231         | 238         | 245         | 252         | 259         | 266         | 273         | 280         | 287         | 294         | 301         | 308         | 315         | 322         | 329         | 336         | 343         | 350         | 357         | 364 |  |
|           | Sub (30 min test 3)  | 172        | 179        | 186        | 193        | 200        | 207        | 214        | 221        | 228         | 235         | 242         | 249         | 256         | 263         | 270         | 277         | 284         | 291         | 298         | 305         | 312         | 319         | 326         | 333         | 340         | 347         | 354         | 361         | 368         | 375 |  |
|           | Sub (30 min test 4)  | 186        | 193        | 200        | 207        | 214        | 221        | 228        | 235        | 242         | 249         | 256         | 263         | 270         | 277         | 284         | 291         | 298         | 305         | 312         | 319         | 326         | 333         | 340         | 347         | 354         | 361         | 368         | 375         | 382         | 389 |  |
|           | Sub (30 min test 5)  | 199        | 206        | 213        | 220        | 227        | 234        | 241        | 248        | 255         | 262         | 269         | 276         | 283         | 290         | 297         | 304         | 311         | 318         | 325         | 332         | 339         | 346         | 353         | 360         | 367         | 374         | 381         | 388         | 395         | 402 |  |
|           | Sub (30 min test 6)  | 213        | 220        | 227        | 234        | 241        | 248        | 255        | 262        | 269         | 276         | 283         | 290         | 297         | 304         | 311         | 318         | 325         | 332         | 339         | 346         | 353         | 360         | 367         | 374         | 381         | 388         | 395         | 402         | 409         | 416 |  |
|           | Sub (30 min test 7)  | 227        | 234        | 241        | 248        | 255        | 262        | 269        | 276        | 283         | 290         | 297         | 304         | 311         | 318         | 325         | 332         | 339         | 346         | 353         | 360         | 367         | 374         | 381         | 388         | 395         | 402         | 409         | 416         | 423         | 430 |  |
|           | Sub (30 min test 8)  | 241        | 248        | 255        | 262        | 269        | 276        | 283        | 290        | 297         | 304         | 311         | 318         | 325         | 332         | 339         | 346         | 353         | 360         | 367         | 374         | 381         | 388         | 395         | 402         | 409         | 416         | 423         | 430         | 437         | 444 |  |
|           | Sub (30 min test 9)  | 255        | 262        | 269        | 276        | 283        | 290        | 297        | 304        | 311         | 318         | 325         | 332         | 339         | 346         | 353         | 360         | 367         | 374         | 381         | 388         | 395         | 402         | 409         | 416         | 423         | 430         | 437         | 444         | 451         | 458 |  |
|           | Sub (30 min test 10) | 269        | 276        | 283        | 290        | 297        | 304        | 311        | 318        | 325         | 332         | 339         | 346         | 353         | 360         | 367         | 374         | 381         | 388         | 395         | 402         | 409         | 416         | 423         | 430         | 437         | 444         | 451         | 458         | 465         | 472 |  |
| Group 2   | Sub (30 min test 1)  | 283        | 290        | 297        | 304        | 311        | 318        | 325        | 332        | 339         | 346         | 353         | 360         | 367         | 374         | 381         | 388         | 395         | 402         | 409         | 416         | 423         | 430         | 437         | 444         | 451         | 458         | 465         | 472         | 479         | 486 |  |
|           | Sub (30 min test 2)  | 297        | 304        | 311        | 318        | 325        | 332        | 339        | 346        | 353         | 360         | 367         | 374         | 381         | 388         | 395         | 402         | 409         | 416         | 423         | 430         | 437         | 444         | 451         | 458         | 465         | 472         | 479         | 486         | 493         | 500 |  |
|           | Sub (30 min test 3)  | 311        | 318        | 325        | 332        | 339        | 346        | 353        | 360        | 367         | 374         | 381         | 388         | 395         | 402         | 409         | 416         | 423         | 430         | 437         | 444         | 451         | 458         | 465         | 472         | 479         | 486         | 493         | 500         | 507         | 514 |  |
|           | Sub (30 min test 4)  | 325        | 332        | 339        | 346        | 353        | 360        | 367        | 374        | 381         | 388         | 395         | 402         | 409         | 416         | 423         | 430         | 437         | 444         | 451         | 458         | 465         | 472         | 479         | 486         | 493         | 500         | 507         | 514         | 521         | 528 |  |
|           | Sub (30 min test 5)  | 339        | 346        | 353        | 360        | 367        | 374        | 381        | 388        | 395         | 402         | 409         | 416         | 423         | 430         | 437         | 444         | 451         | 458         | 465         | 472         | 479         | 486         | 493         | 500         | 507         | 514         | 521         | 528         | 535         | 542 |  |
|           | Sub (30 min test 6)  | 353        | 360        | 367        | 374        | 381        | 388        | 395        | 402        | 409         | 416         | 423         | 430         | 437         | 444         | 451         | 458         | 465         | 472         | 479         | 486         | 493         | 500         | 507         | 514         | 521         | 528         | 535         | 542         | 549         | 556 |  |
|           | Sub (30 min test 7)  | 367        | 374        | 381        | 388        | 395        | 402        | 409        | 416        | 423         | 430         | 437         | 444         | 451         | 458         | 465         | 472         | 479         | 486         | 493         | 500         | 507         | 514         | 521         | 528         | 535         | 542         | 549         | 556         | 563         | 570 |  |
|           | Sub (30 min test 8)  | 381        | 388        | 395        | 402        | 409        | 416        | 423        | 430        | 437         | 444         | 451         | 458         | 465         | 472         | 479         | 486         | 493         | 500         | 507         | 514         | 521         | 528         | 535         | 542         | 549         | 556         | 563         | 570         | 577         | 584 |  |
|           | Sub (30 min test 9)  | 395        | 402        | 409        | 416        | 423        | 430        | 437        | 444        | 451         | 458         | 465         | 472         | 479         | 486         | 493         | 500         | 507         | 514         | 521         | 528         | 535         | 542         | 549         | 556         | 563         | 570         | 577         | 584         | 591         | 598 |  |
|           | Sub (30 min test 10) | 409        | 416        | 423        | 430        | 437        | 444        | 451        | 458        | 465         | 472         | 479         | 486         | 493         | 500         | 507         | 514         | 521         | 528         | 535         | 542         | 549         | 556         | 563         | 570         | 577         | 584         | 591         | 598         | 605         | 612 |  |
| Group 3   | Sub (30 min test 1)  | 423        | 430        | 437        | 444        | 451        | 458        | 465        | 472        | 479         | 486         | 493         | 500         | 507         | 514         | 521         | 528         | 535         | 542         | 549         | 556         | 563         | 570         | 577         | 584         | 591         | 598         | 605         | 612         | 619         | 626 |  |
|           | Sub (30 min test 2)  | 437        | 444        | 451        | 458        | 465        | 472        | 479        | 486        | 493         | 500         | 507         | 514         | 521         | 528         | 535         | 542         | 549         | 556         | 563         | 570         | 577         | 584         | 591         | 598         | 605         | 612         | 619         | 626         | 633         | 640 |  |
|           | Sub (30 min test 3)  | 451        | 458        | 465        | 472        | 479        | 486        | 493        | 500        | 507         | 514         | 521         | 528         | 535         | 542         | 549         | 556         | 563         | 570         | 577         | 584         | 591         | 598         | 605         | 612         | 619         | 626         | 633         | 640         | 647         | 654 |  |
|           | Sub (30 min test 4)  | 465        | 472        | 479        | 486        | 493        | 500        | 507        | 514        | 521         | 528         | 535         | 542         | 549         | 556         | 563         | 570         | 577         | 584         | 591         | 598         | 605         | 612         | 619         | 626         | 633         | 640         | 647         | 654         | 661         | 668 |  |
|           | Sub (30 min test 5)  | 479        | 486        | 493        | 500        | 507        | 514        | 521        | 528        | 535         | 542         | 549         | 556         | 563         | 570         | 577         | 584         | 591         | 598         | 605         | 612         | 619         | 626         | 633         | 640         | 647         | 654         | 661         | 668         | 675         | 682 |  |
|           | Sub (30 min test 6)  | 493        | 500        | 507        | 514        | 521        | 528        | 535        | 542        | 549         | 556         | 563         | 570         | 577         | 584         | 591         | 598         | 605         | 612         | 619         | 626         | 633         | 640         | 647         | 654         | 661         | 668         | 675         | 682         | 689         | 696 |  |
|           | Sub (30 min test 7)  | 507        | 514        | 521        | 528        | 535        | 542        | 549        | 556        | 563         | 570         | 577         | 584         | 591         | 598         | 605         | 612         | 619         | 626         | 633         | 640         | 647         | 654         | 661         | 668         | 675         | 682         | 689         | 696         | 703         | 710 |  |
|           | Sub (30 min test 8)  | 521        | 528        | 535        | 542        | 549        | 556        | 563        | 570        | 577         | 584         | 591         | 598         | 605         | 612         | 619         | 626         | 633         | 640         | 647         | 654         | 661         | 668         | 675         | 682         | 689         | 696         | 703         | 710         | 717         | 724 |  |
|           | Sub (30 min test 9)  | 535        | 542        | 549        | 556        | 563        | 570        | 577        | 584        | 591         | 598         | 605         | 612         | 619         | 626         | 633         | 640         | 647         | 654         | 661         | 668         | 675         | 682         | 689         | 696         | 703         | 710         | 717         | 724         | 731         | 738 |  |
|           | Sub (30 min test 10) | 549        | 556        | 563        | 570        | 577        | 584        | 591        | 598        | 605         | 612         | 619         | 626         | 633         | 640         | 647         | 654         | 661         | 668         | 675         | 682         | 689         | 696         | 703         | 710         | 717         | 724         | 731         | 738         | 745         | 752 |  |
| Group 4   | Sub (30 min test 1)  | 563        | 570        | 577        | 584        | 591        | 598        | 605        | 612        | 619         | 626         | 633         | 640         | 647         | 654         | 661         | 668         | 675         | 682         | 689         | 696         | 703         | 710         | 717         | 724         | 731         | 738         | 745         | 752         | 759         | 766 |  |
|           | Sub (30 min test 2)  | 577        | 584        | 591        | 598        | 605        | 612        | 619        | 626        | 633         | 640         | 647         | 654         | 661         | 668         | 675         | 682         | 689         | 696         | 703         | 710         | 717         | 724         | 731         | 738         | 745         | 752         | 759         | 766         | 773         | 780 |  |
|           | Sub (30 min test 3)  | 591        | 598        | 605        | 612        | 619        | 626        | 633        | 640        | 647         | 654         | 661         | 668         | 675         | 682         | 689         | 696         | 703         | 710         | 717         | 724         | 731         | 738         | 745         | 752         | 759         | 766         | 773         | 780         | 787         | 794 |  |
|           | Sub (30 min test 4)  | 605        | 612        | 619        | 626        | 633        | 640        | 647        | 654        | 661         | 668         | 675         | 682         | 689         | 696         | 703         | 710         | 717         | 724         | 731         | 738         | 745         | 752         | 759         | 766         | 773         | 780         | 787         | 794         | 801         | 808 |  |
|           | Sub (30 min test 5)  | 619        | 626        | 633        | 640        | 647        | 654        | 661        | 668        | 675         | 682         | 689         | 696         | 703         | 710         | 717         | 724         | 731         | 738         | 745         | 752         | 759         | 766         | 773         | 780         | 787         | 794         | 801         | 808         | 815         | 822 |  |
|           | Sub (30 min test 6)  | 633        | 640        | 647        | 654        | 661        | 668        | 675        | 682        | 689         | 696         | 703         | 710         | 717         | 724         | 731         | 738         | 745         | 752         | 759         | 766         | 773         | 780         | 787         | 794         | 801         | 808         | 815         | 822         | 829         | 836 |  |
|           | Sub (30 min test 7)  | 647        | 654        | 661        | 668        | 675        | 682        | 689        | 696        | 703         | 710         | 717         | 724         | 731         | 738         | 745         | 752         | 759         | 766         | 773         | 780         | 787         | 794         | 801         | 808         | 815         | 822         | 829         | 836         | 843         | 850 |  |
|           | Sub (30 min test 8)  | 661        | 668        | 675        | 682        | 689        | 696        | 703        | 710        | 717         | 724         | 731         | 738         | 745         | 752         | 759         | 766         | 773         | 780         | 787         | 794         | 801         | 808         | 815         | 822         | 829         | 836         | 843         | 850         | 857         | 864 |  |
|           | Sub (30 min test 9)  | 675        | 682        | 689        | 696        | 703        | 710        | 717        | 724        | 731         | 738         | 745         | 752         | 759         | 766         | 773         | 780         | 787         | 794         | 801         | 808         | 815         | 822         | 829         | 836         | 843         | 850         | 857         | 864         | 871         | 878 |  |
|           | Sub (30 min test 10) | 689        | 696        | 703        | 710        | 717        | 724        | 731        | 738        | 745         | 752         | 759         | 766         | 773         | 780         | 787         | 794         | 801         | 808         | 815         | 822         | 829         | 836         | 843         | 850         | 857         | 864         | 871         | 878         | 885         | 892 |  |
| Group 5   | Sub (30 min test 1)  | 703        | 710        | 717        | 724        | 731        | 738        | 745        | 752        | 759         | 766         | 773         | 780         | 787         | 794         | 801         | 808         | 815         | 822         | 829         | 836         | 843         | 850         | 857         | 864         | 871         | 878         | 885         | 892         | 899         | 906 |  |
|           | Sub (30 min test 2)  | 717        | 724        | 731        | 738        | 745        | 752        | 759        | 766        | 773         | 780         | 787         | 794         | 801         | 808         | 815         | 822         | 829         | 836         | 843         | 850         | 857         | 864         | 871         | 878         | 885         | 892         | 899         | 906         | 913         | 920 |  |
|           | Sub (30 min test 3)  | 731        | 738        | 745        | 752        | 759        | 766        | 773        | 780        | 787         | 794         | 801         | 808         | 815         | 822         | 829         | 836         | 843         | 850         | 857         | 864         | 871         | 878         | 885         | 892         | 899         | 906         | 913         | 920         | 927         | 934 |  |
|           | Sub (30 min test 4)  | 745        | 752        | 759        | 766        | 773        | 780        | 787        | 794        | 801         | 808         | 815         | 822         | 829         | 836         | 843         | 850         | 857         | 864         | 871         | 878         | 885         | 892         | 899         | 906         | 913         | 920         | 927         | 934         | 941         | 948 |  |
|           | Sub (30 min test 5)  | 759        | 766        | 773        | 780        | 787        | 794        | 801        | 808        | 815         | 822         | 829         | 836         | 843         | 850         | 857         | 864         | 871         | 878         | 885         | 892         | 899         | 906         | 913         | 920         | 927         | 934         | 941         | 948         | 955         | 962 |  |
|           | Sub (30 min test 6)  | 773        | 780        | 787        | 794        | 801        | 808        | 815        | 822        | 829         | 836         | 843         | 850         | 857         | 864         | 871         | 878         | 885         | 892         | 899         | 906         | 913         | 920         | 927         | 934</       |             |             |             |             |             |     |  |
